# Supplementary material for: Identification of 10 Hub genes related to the progression of colorectal cancer by co-expression analysis
Source: PeerJ. 2020 Jul 28;8:e9633. doi: 10.7717/peerj.9633 (PMC7664468; doi:10.7717/peerj.9633)
Supplement: Supplemental Information 8 [file peerj-08-9633-s008.xlsx]

## Sheet: yellow
SUID	AverageShortestPathLength	BetweennessCentrality	ClosenessCentrality	ClusteringCoefficient	Degree	Eccentricity	IsSingleNode	name	NeighborhoodConnectivity	NumberOfDirectedEdges	NumberOfUndirectedEdges	PartnerOfMultiEdgedNodePairs	Radiality	selected	SelfLoops	shared name	Stress	TopologicalCoefficient
360	1	0.230159	1	0.52381	7	1	FALSE	MT1H	4.14286	7	0	0	1	FALSE	0	MT1H	20	0.591837
362	1.14286	0.126984	0.875	0.6	6	2	FALSE	MT1X	4.5	6	0	0	0.928571	FALSE	0	MT1X	12	0.642857
366	1.14286	0.0873016	0.875	0.666667	6	2	FALSE	MT1E	4.66667	6	0	0	0.928571	FALSE	0	MT1E	10	0.666667
359	1.28571	0.031746	0.777778	0.8	5	2	FALSE	MT1G	5.2	5	0	0	0.857143	FALSE	0	MT1G	4	0.742857
364	1.42857	0	0.7	1	4	2	FALSE	MT2A	6	4	0	0	0.785714	FALSE	0	MT2A	0	0.857143
374	1.57143	0	0.636364	1	3	2	FALSE	MT1A	6.33333	3	0	0	0.714286	FALSE	0	MT1A	0	0.904762
377	1.57143	0	0.636364	1	3	2	FALSE	MT1M	6	3	0	0	0.714286	FALSE	0	MT1M	0	0.857143
388	1	0.666667	1	0.333333	3	1	FALSE	FABP1	1.66667	3	0	0	1	FALSE	0	FABP1	4	0.666667
379	1.71429	0	0.583333	1	2	2	FALSE	MT1B	6.5	2	0	0	0.642857	FALSE	0	MT1B	0	0.928571
385	1	1	1	0	2	1	FALSE	GGH	1	2	0	0	1	FALSE	0	GGH	2	0
389	1.33333	0	0.75	1	2	2	FALSE	MOGAT2	2.5	2	0	0	0.833333	FALSE	0	MOGAT2	0	0.833333
397	1.33333	0	0.75	1	2	2	FALSE	MEP1A	2.5	2	0	0	0.833333	FALSE	0	MEP1A	0	0.833333
356	1	0	1	0	1	1	FALSE	ADH1C	1	1	0	0	1	FALSE	0	ADH1C	0	0
357	1	0	1	0	1	1	FALSE	ADH1A	1	1	0	0	1	FALSE	0	ADH1A	0	0
381	1	0	1	0	1	1	FALSE	FABP6	1	1	0	0	1	FALSE	0	FABP6	0	0
382	1	0	1	0	1	1	FALSE	SLC51B	1	1	0	0	1	FALSE	0	SLC51B	0	0
384	1.5	0	0.666667	0	1	2	FALSE	UGDH	2	1	0	0	0.75	FALSE	0	UGDH	0	0
392	1	0	1	0	1	1	FALSE	NOX1	1	1	0	0	1	FALSE	0	NOX1	0	0
393	1	0	1	0	1	1	FALSE	EREG	1	1	0	0	1	FALSE	0	EREG	0	0
400	1	0	1	0	1	1	FALSE	TMPRSS3	1	1	0	0	1	FALSE	0	TMPRSS3	0	0
401	1	0	1	0	1	1	FALSE	TFF2	1	1	0	0	1	FALSE	0	TFF2	0	0
403	1	0	1	0	1	1	FALSE	MORC4	1	1	0	0	1	FALSE	0	MORC4	0	0
404	1	0	1	0	1	1	FALSE	SPINK1	1	1	0	0	1	FALSE	0	SPINK1	0	0
406	1	0	1	0	1	1	FALSE	EPHB2	1	1	0	0	1	FALSE	0	EPHB2	0	0
407	1	0	1	0	1	1	FALSE	PTPRO	1	1	0	0	1	FALSE	0	PTPRO	0	0
409	1.66667	0	0.6	0	1	2	FALSE	SLC26A3	3	1	0	0	0.666667	FALSE	0	SLC26A3	0	0
411	1.5	0	0.666667	0	1	2	FALSE	ABCB1	2	1	0	0	0.75	FALSE	0	ABCB1	0	0

## Sheet: black
SUID	AverageShortestPathLength	BetweennessCentrality	ClosenessCentrality	ClusteringCoefficient	Degree	Eccentricity	IsSingleNode	name	NeighborhoodConnectivity	NumberOfDirectedEdges	NumberOfUndirectedEdges	PartnerOfMultiEdgedNodePairs	Radiality	selected	SelfLoops	shared name	Stress	TopologicalCoefficient
75	1.16667	0.173276	0.857143	0.485714	15	2	FALSE	CXCL8	8.13333	15	0	0	0.944444	FALSE	0	CXCL8	148	0.451852
94	1.27778	0.125834	0.782609	0.551282	13	2	FALSE	CSF2	8.76923	13	0	0	0.907407	FALSE	0	CSF2	112	0.511312
72	1.38889	0.0387446	0.72	0.651515	12	3	FALSE	IL1B	9.25	12	0	0	0.87037	FALSE	0	IL1B	58	0.544118
85	1.33333	0.0868715	0.75	0.560606	12	2	FALSE	CXCL5	8.83333	12	0	0	0.888889	FALSE	0	CXCL5	82	0.490741
73	1.5	0.0119415	0.666667	0.8	10	3	FALSE	IL1A	10.2	10	0	0	0.833333	FALSE	0	IL1A	22	0.6
77	1.55556	0.0537815	0.642857	0.694444	9	3	FALSE	IL1RN	9.88889	9	0	0	0.814815	FALSE	0	IL1RN	54	0.581699
80	1.55556	0.00448462	0.642857	0.888889	9	3	FALSE	MMP1	10.5556	9	0	0	0.814815	FALSE	0	MMP1	10	0.620915
81	1.61111	0.00186741	0.62069	0.928571	8	3	FALSE	MMP3	11	8	0	0	0.796296	FALSE	0	MMP3	4	0.647059
83	1.61111	0.0299564	0.62069	0.607143	8	3	FALSE	CXCL6	9.5	8	0	0	0.796296	FALSE	0	CXCL6	32	0.558824
112	1.66667	0.00746965	0.6	0.821429	8	3	FALSE	IL11	10.375	8	0	0	0.777778	FALSE	0	IL11	10	0.648438
113	1.61111	0.00708344	0.62069	0.821429	8	3	FALSE	OSM	10.25	8	0	0	0.796296	FALSE	0	OSM	12	0.602941
124	1.66667	0.041168	0.6	0.52381	7	3	FALSE	TREM1	9.28571	7	0	0	0.777778	FALSE	0	TREM1	44	0.546218
90	1.66667	0.0888295	0.6	0.466667	6	2	FALSE	PMCH	7.66667	6	0	0	0.777778	FALSE	0	PMCH	66	0.425926
88	1.72222	0.00843731	0.580645	0.7	5	2	FALSE	HCAR3	9.6	5	0	0	0.759259	FALSE	0	HCAR3	10	0.533333
97	1.83333	0.0490125	0.545455	0.166667	4	3	FALSE	PROK2	6	4	0	0	0.722222	FALSE	0	PROK2	40	0.366667
150	1.88889	0	0.529412	1	4	3	FALSE	IL24	12	4	0	0	0.703704	FALSE	0	IL24	0	0.75
116	2	0	0.5	1	3	3	FALSE	CXCL14	11.6667	3	0	0	0.666667	FALSE	0	CXCL14	0	0.777778
134	2.05556	0.00980392	0.486486	0.333333	3	3	FALSE	AQP9	6.66667	3	0	0	0.648148	FALSE	0	AQP9	8	0.487179
92	2.44444	0	0.409091	1	2	3	FALSE	GNA11	5	2	0	0	0.518519	FALSE	0	GNA11	0	0.625

## Sheet: blue
SUID	AverageShortestPathLength	BetweennessCentrality	ClosenessCentrality	ClusteringCoefficient	Degree	Eccentricity	IsSingleNode	name	NeighborhoodConnectivity	NumberOfDirectedEdges	NumberOfUndirectedEdges	PartnerOfMultiEdgedNodePairs	Radiality	selected	SelfLoops	shared name	Stress	TopologicalCoefficient
268	3.07692	0.282051	0.325	0	2	6	FALSE	GNG2	3	2	0	0	0.740385	FALSE	0	GNG2	72	0.5
269	3.84615	0.153846	0.26	0	2	7	FALSE	ADRB2	1.5	2	0	0	0.644231	FALSE	0	ADRB2	38	0.5
271	4.76923	0	0.209677	0	1	8	FALSE	PRKAR2B	2	1	0	0	0.528846	FALSE	0	PRKAR2B	0	0
273	2.46154	0.391026	0.40625	0.333333	4	5	FALSE	CXCL11	3.25	4	0	0	0.817308	FALSE	0	CXCL11	104	0.5
275	3.38462	0.025641	0.295455	0	2	7	FALSE	PLCG2	2.5	2	0	0	0.701923	FALSE	0	PLCG2	4	0.5
276	2.84615	0.115385	0.351351	0	2	6	FALSE	IL6R	3	2	0	0	0.769231	FALSE	0	IL6R	28	0.5
278	1	0	1	0	1	1	FALSE	FOXA2	1	1	0	0	1	FALSE	0	FOXA2	0	0
279	1	0	1	0	1	1	FALSE	MNX1	1	1	0	0	1	FALSE	0	MNX1	0	0
281	2.23077	0.525641	0.448276	0.166667	4	5	FALSE	IL10RA	3.25	4	0	0	0.846154	FALSE	0	IL10RA	132	0.392857
283	2.23077	0.217949	0.448276	0.5	4	4	FALSE	GZMB	3.75	4	0	0	0.846154	FALSE	0	GZMB	68	0.46875
285	2.15385	0.314103	0.464286	0.4	5	4	FALSE	TLR3	3.2	5	0	0	0.855769	FALSE	0	TLR3	84	0.4
287	4.23077	0	0.236364	0	1	8	FALSE	ETV4	3	1	0	0	0.596154	FALSE	0	ETV4	0	0
288	3.30769	0.166667	0.302326	0	3	7	FALSE	KIT	1.66667	3	0	0	0.711538	FALSE	0	KIT	36	0.333333
291	2.76923	0	0.361111	1	2	5	FALSE	DDX60	4.5	2	0	0	0.778846	FALSE	0	DDX60	0	0.75
294	2.76923	0.230769	0.361111	0	2	6	FALSE	IKZF1	3.5	2	0	0	0.778846	FALSE	0	IKZF1	56	0.5
298	1	0	1	0	1	1	FALSE	PLCL2	1	1	0	0	1	FALSE	0	PLCL2	0	0
299	1	0	1	0	1	1	FALSE	UBD	1	1	0	0	1	FALSE	0	UBD	0	0
303	3	0	0.333333	1	2	5	FALSE	S100B	4.5	2	0	0	0.75	FALSE	0	S100B	0	0.9
